# Supplementary material
Source: publisher figshare collection journal article supplement (https://karger.figshare.com/ndownloader/files/15121877)
Supplement: Supplementary file 1 [file 15121877]

| **Supplement Table 1. Distribution of Population Characteristics by Quartiles of Age** | | | | | | | | | | | |
| --- | --- | --- | --- | --- | --- | --- | --- | --- | --- | --- | --- |
|  |  |  | Quartile 1 |  | Quartile 2 |  | Quartile 3 |  | Quartile 4 |  |  |
| Characteristic | Overall (y) |  | 24 – 57 (y) |  | 58 – 65 (y) |  | 66 – 72 (y) |  | 73 – 96 (y) |  | p-value* |
|  | n = 1088 |  | N = 284 |  | n = 299 |  | n = 261 |  | n = 244 |  |  |
| Age (y) | 64 |  | 50 |  | 62 |  | 68 |  | 78 |  | - |
| Male sex (%) | 74 |  | 81 |  | 77 |  | 71 |  | 64 |  | <0.01 |
| Body mass index (kg/m2) | 29 |  | 31 |  | 30 |  | 29 |  | 28 |  | 0.13 |
| Hypertension (%) | 77 |  | 64 |  | 80 |  | 79 |  | 86 |  | <0.01 |
| Hyperlipidemia (%) | 79 |  | 76 |  | 80 |  | 81 |  | 78 |  | 0.43 |
| Diabetes (%) | 32 |  | 29 |  | 34 |  | 36 |  | 27 |  | 0.09 |
| Active smoking (%) | 12 |  | 21 |  | 16 |  | 3 |  | 7 |  | <0.01 |
| Conventional CVD RF (#) | 3.8 |  | 3.5 |  | 3.8 |  | 4.1 |  | 4.2 |  | <0.01 |
| Family history of MI (%) | 28 |  | 33 |  | 31 |  | 26 |  | 21 |  | 0.01 |
| Personal stress (%) | 17 |  | 24 |  | 19 |  | 15 |  | 9 |  | <0.01 |
| Financial stress (%) | 26 |  | 35 |  | 31 |  | 25 |  | 13 |  | <0.01 |
| Depression (%) | 10 |  | 10 |  | 8 |  | 13 |  | 9 |  | 0.28 |
| Married (%) | 67 |  | 69 |  | 72 |  | 64 |  | 60 |  | 0.02 |
| Fruits and/or vegetables/day (cups) | 3 |  | 2.8 |  | 3 |  | 3 |  | 3.2 |  | <0.01 |
| Aspirin (%) | 73 |  | 66 |  | 80 |  | 77 |  | 70 |  | <0.01 |
| Statin medication | 64 |  | 55 |  | 65 |  | 69 |  | 68 |  | <0.01 |
| Anti-hypertension medication | 59 |  | 52 |  | 63 |  | 61 |  | 60 |  | 0.1 |
| Diabetes medication | 30 |  | 28 |  | 32 |  | 36 |  | 25 |  | 0.05 |
| Systolic blood pressure (mmHg) | 131 |  | 128 |  | 131 |  | 131 |  | 136 |  | < 0.001 |
| Diastolic blood pressure (mmHg) | 73 |  | 76 |  | 74 |  | 72 |  | 68 |  | 0.47 |
| Hemoglobin A1c (%) | 6.5 |  | 6.6 |  | 6.5 |  | 6.6 |  | 6.1 |  | <0.01 |
| Total cholesterol (mg/dl) | 167 |  | 179 |  | 165 |  | 160 |  | 161 |  | <0.01 |
| LDL-C (mg/dl) | 92 |  | 102 |  | 90 |  | 87 |  | 89 |  | <0.01 |
| HDL-C (mg/dl) | 46 |  | 44 |  | 45 |  | 47 |  | 50 |  | <0.01 |
| Triglycerides (mg/dl) | 151 |  | 208 |  | 149 |  | 127 |  | 112 |  | <0.01 |
| *Chi-squared test was used for categorical variables and ANOVA for continuous variables. Conventional CVD RF - The number of cardiovascular disease (CVD) risk factors (male, hypertension, hyperlipidemia, overweight, active smoking, diabetes). Y - years. RF – Risk Factors. MI – Myocardial Infarction. | | | | | | | | | | | |
|
